# Supplementary material for: Chronic heart failure and mortality in patients with community-acquired Staphylococcus aureus bacteremia: a population-based cohort study
Source: Springer Nature journal article supplement (doi:10.1186/s12879-016-1570-7), 2016-05-25
Supplement: MOESM2 [file 10198926]

## Additional file 2

### Codes for diagnoses, procedures, medication and blood tests

---

**Preadmission comorbid conditions. Diagnoses codes are according to the 8<sup>th</sup> and 10<sup>th</sup> revision of the International Classification of Diseases, ICD-8 and ICD-10**

---

| <b>Condition</b>            | <b>ICD-8</b>                                                                                                                                                                                                                                                                | <b>ICD-10</b>                                                         |
|-----------------------------|-----------------------------------------------------------------------------------------------------------------------------------------------------------------------------------------------------------------------------------------------------------------------------|-----------------------------------------------------------------------|
| Chronic heart failure       | 427.09, 427.10, 427.11, 427.19,<br>428.99, 784.29                                                                                                                                                                                                                           | I50, I11.0, I13.0, I13.2, I42.0,<br>I42.6, I42.7, I42.8, I42.9, I25.5 |
| Cardiomyopathy              | 425.99                                                                                                                                                                                                                                                                      | I42                                                                   |
| Heart valve disease         | 394.00-394.02, 394.08, 394.90,<br>394.91, 394.92, 394.98, 394.99,<br>395.90, 395.01, 395.02, 395.08,<br>395.90-395.92, 395.98-395.99,<br>396.00-396.04, 396.08-39.609,<br>396.90-396.93, 396.04, 396.08,<br>396.09, 396.90, 396.91-396.94,<br>396.98-397.01, 397.09, 398.99 | I34, I35, I05-I08, I09.1, I09.8,<br>I09.9, I36-I39                    |
| Myocardial infarction       | 410.09, 410.99                                                                                                                                                                                                                                                              | I21-I23                                                               |
| Atrial fibrillation         | 427.93, 427.94                                                                                                                                                                                                                                                              | I48                                                                   |
| Diabetes                    | 249.00, 249.06, 249.07, 249.09,<br>250.00, 250.06, 250.07, 250.09                                                                                                                                                                                                           | E10-E14. O24 (except O24.4),<br>G63.2, H36.0, N08.3                   |
| Peripheral vascular disease | 440, 441, 442, 443, 444, 445                                                                                                                                                                                                                                                | I70, I71, I72, I73, I74, I77                                          |
| Cerebrovascular disease     | 430-438                                                                                                                                                                                                                                                                     | I60-I69, G45, G46                                                     |
| Dementia                    | 290.09-290.19, 293.09                                                                                                                                                                                                                                                       | F00-F03, F05.1, G30                                                   |

|                                  |                                                               |                                                                          |
|----------------------------------|---------------------------------------------------------------|--------------------------------------------------------------------------|
| Chronic pulmonary disease        | 490-493, 515-518                                              | J40-J47, J60-J67, J68.4, J70.1, J70.3, J84.1, J92.0, J96.1, J98.2, J98.3 |
| Connective tissue disease        | 712, 716, 734, 446, 135.99                                    | M05, M06, M08, M09, M30, M31, M32, M33, M34, M35, M36, D86               |
| Ulcer disease                    | 530.91, 530.98, 531-534                                       | K22.1, K25-K28                                                           |
| Mild liver disease               | 571, 573.01, 573.04                                           | B18, K70.0-K70.3, K70.9, K71, K73, K74, K76.0                            |
| Hemiplegia                       | 344                                                           | G81, G82                                                                 |
| Moderate to severe renal disease | 403, 404, 580-583, 584, 590.09, 593.19, 753.10-753.19, 792    | I12, I13, N00-N05, N07, N11, N14, N17-N19, Q61                           |
| Any tumor                        | 140-194                                                       | C00-C75                                                                  |
| Leukemia                         | 204-207                                                       | C91-C95                                                                  |
| Lymphoma                         | 200-203, 275.59                                               | C81-C85, C88, C90, C96                                                   |
| Moderate to severe liver disease | 070.00, 070.02, 070.04, 070.06, 070.08, 573.00, 456.00-456.09 | B15.0, B16.0, B16.2, B19.0, K70.4, K72, K76.6, I85                       |
| Metastatic solid tumor           | 195-198, 199                                                  | C76-C80                                                                  |
| AIDS                             | 079.83                                                        | B21-B24                                                                  |
| Hypertension                     | 400-404                                                       | I10-I13                                                                  |
| Osteoporosis                     | 723.09                                                        | M80-M82                                                                  |

|                                     |                                             |                                                         |
|-------------------------------------|---------------------------------------------|---------------------------------------------------------|
| Conditions related to alcohol abuse | 291.09-291.99, 303.09-303.29, 303.91-303.99 | F10, K86.0, Z72.1, T51, K29.2, G62.1, G31.2, I42.6, K70 |
| Conditions related to drug abuse    | 304.09-304.99                               | F11-F16, F18-F19, T40                                   |

---

**Procedures. Codes regarding dialysis are according to Danish Treatment codes and according to the 10<sup>th</sup> revision of the International Classification of Diseases, ICD-10.**

---

|                 | <b>Danish treatment codes</b>                                                                                            | <b>ICD-10</b>           |
|-----------------|--------------------------------------------------------------------------------------------------------------------------|-------------------------|
| <b>Dialysis</b> | 98300, 94340, 94350<br>BJFD0, BJFD2                                                                                      | Z99.2, Z49, Z49.2, BJFD |
| <b>Surgery</b>  | All surgical codes (K-codes) in the Nordic Medico-Statistical Committee (NOMESCO) Classification of Surgical Procedures. |                         |

---

**Medication codes are according to the Anatomical Therapeutic Classification (ATC)**

---

| <b>Type of medication</b>   | <b>ATC codes</b>    |
|-----------------------------|---------------------|
| Loop-diuretics              | C03CA01             |
| Immunosuppressive therapy   | L01, L04            |
| Systemic antibiotic therapy | J01                 |
| ACE inhibitors              | C09                 |
| Beta-blockers               | C07                 |
| Acetylsalicylic acid        | B01AC06             |
| Statins                     | C10AA, C10B, B04AB, |

---

**Blood tests according to local analysis codes and Nomenclature for Properties and Units (NPU)-codes**

---

**Blood test****Local analysis and NPU-codes**

White blood count

NPU02593, 2593, 122577, 37, 1312240, 141240
